# Supplementary material for: Coordinated targeting of CK2 and KIT in gastrointestinal stromal tumours
Source: PubMed Central journal article supplement (PMC7000686; doi:10.1038/s41416-019-0657-5), 2019-11-28
Supplement: 41416_2019_657_MOESM1_ESM.pdf [file 41416_2019_657_MOESM1_ESM.pdf]

Supplemental Table 1. Apoptosis evaluation (%) in GIST cell lines after treatment with CX4945 and imatinib.

| Cell lines<br>inhibitors | GIST-T1 |             |      | GIST882 |             |      | GIST430 |            |      | GIST48 |             |      |
|--------------------------|---------|-------------|------|---------|-------------|------|---------|------------|------|--------|-------------|------|
|                          | Early   | late        | dead | early   | late        | dead | early   | late       | dead | early  | late        | dead |
| DMSO                     | 0.3     | <b>3.2</b>  | 3.8  | 0       | <b>4.2</b>  | 7.9  | 0.7     | <b>6.3</b> | 18   | 0      | <b>14.4</b> | 0.2  |
| CX                       | 0       | <b>3.4</b>  | 2.4  | 0       | <b>4.6</b>  | 8.7  | 0.2     | <b>7.1</b> | 13.2 | 0.1    | <b>3.2</b>  | 0.1  |
| IM1                      | 0       | <b>3.4</b>  | 3.5  | 0       | <b>4.1</b>  | 10.1 | 0       | <b>7.2</b> | 14.5 | 1.5    | <b>13.7</b> | 29.2 |
| IM1+CX                   | 0       | <b>5.6</b>  | 11   | 0.3     | <b>21</b>   | 38.4 | 0.2     | <b>11</b>  | 22.2 | 1.0    | <b>18.3</b> | 26   |
| IM2                      | 0       | <b>6.5</b>  | 7.8  | 0       | <b>5.1</b>  | 9.8  | 0.1     | <b>8.4</b> | 22.5 | 1.6    | <b>12.1</b> | 25.8 |
| IM2+CX                   | 0       | <b>30.5</b> | 14.5 | 0.2     | <b>22.6</b> | 41   | 0       | <b>12</b>  | 25.4 | 1.6    | <b>16.3</b> | 26.2 |

**Notes:** GIST cells in six-well plates were treated with CX4945 (5  $\mu$ M) or imatinib (0.05 and 0.5  $\mu$ M for GIST-T1 and GIST882; 0.5 and 1  $\mu$ M for GIST430/654 and GIST48).

## SFigure 1

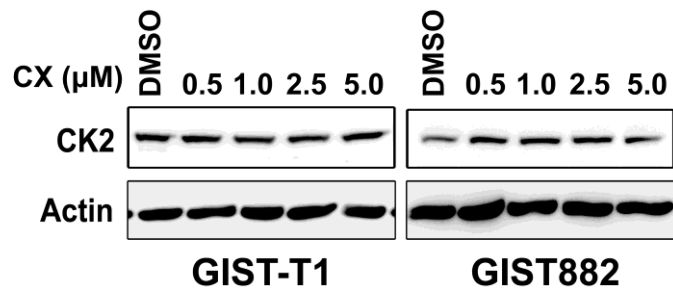

**Supplemental Figure 1.** Immunoblotting evaluation of CK2 expression in GIST-T1 and GIST882 cells after treatment with the CK2 inhibitor CX4945 (0.5, 1.0, 2.5, and 5 μM) for 6 h in serum-free medium. Actin stain is a loading control. CX4945 treatment had no impact on CK2 expression in GIST-T1 and GIST882. Immunoblotting experiments were performed from two independent replicates for each sample.

## SFigure 2

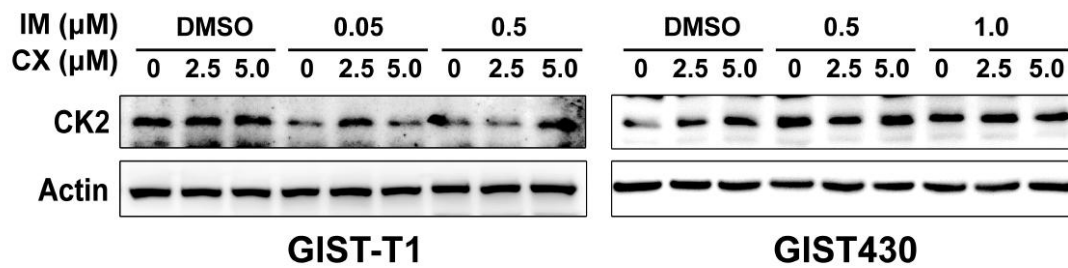

**Supplemental Figure 2.** CK2 expression was evaluated in GIST-T1 and GIST430/654 by immunoblotting 6 h after treatment with CX4945 (CX: 2.5 and 5  $\mu\text{M}$ ) and imatinib (IM: 0.05, 0.5  $\mu\text{M}$ , and 1  $\mu\text{M}$ ). Actin stain is a loading control. CX4945 treatment had no impact on CK2 expression in both GIST cell lines. Immunoblotting experiments were performed from two independent replicates for each cell line.

### SFigure 3

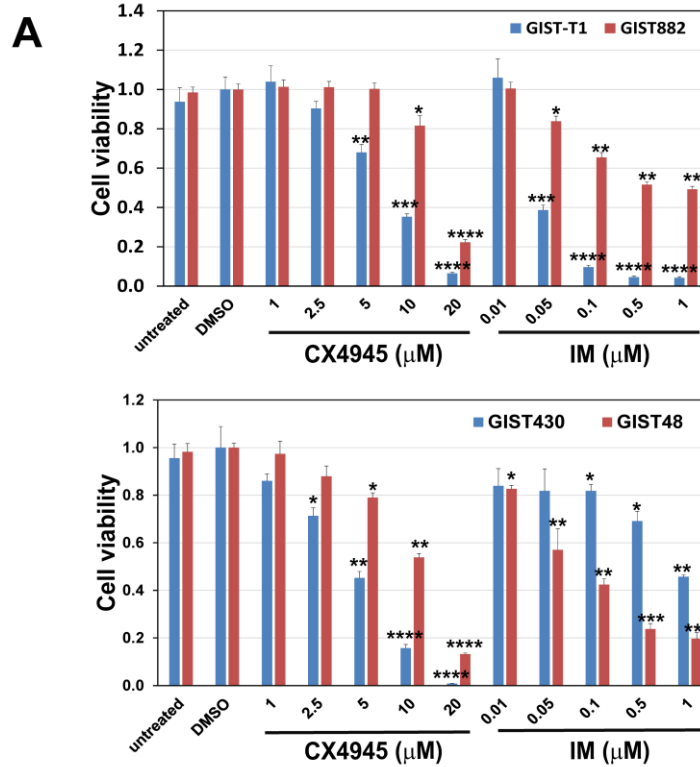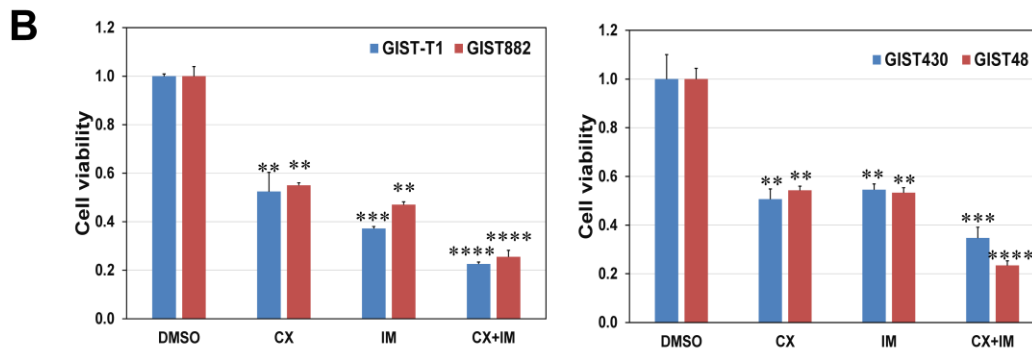

**Supplemental Figure 3.** Additive effects of coordinated inhibition of KIT and CK2 as demonstrated by cell viability (**A** and **B**), showing that combined inhibition of KIT and CK2 induced greater anti-proliferative effects than either intervention alone in GIST cell lines (GIST-T1, GIST882, GIST430/654, and GIST48). **A**) Cell viability was evaluated by a Cell-titer Glo® ATP-based luminescence assay in GIST cell lines

(GIST-T1, GIST882, GIST430/654, and GIST48), 6 days after treatment with CX4945 (1, 2.5, 5, 10, and 20  $\mu\text{M}$ ) and IM (0.01, 0.05, 0.1, 0.5, and 1  $\mu\text{M}$ ). Data are normalized to DMSO and represent the mean values ( $\pm$  s.d.) from quadruplicate wells, averaged from two independent experiments for each cell line. Statistically significant differences between untreated control and inhibitor treatments are presented as  $*p < 0.05$ ,  $**p < 0.01$ ,  $***p < 0.001$ ,  $****p < 0.0001$ . **B)** Cell viability was evaluated by a Cell-titer Glo® ATP-based luminescence assay in GIST cell lines, 6 days after treatment with CX4945 (6.8  $\mu\text{M}$  for GIST-T1, 16.4  $\mu\text{M}$  for GIST882, 4.7  $\mu\text{M}$  for GIST430/654, and 11  $\mu\text{M}$  for GIST48) and IM (0.039  $\mu\text{M}$  for GIST-T1, 0.5  $\mu\text{M}$  for GIST882, 0.66  $\mu\text{M}$  for GIST430/654, and 0.09  $\mu\text{M}$  for GIST48). Data are normalized to DMSO and represent the mean values ( $\pm$  s.d.) from quadruplicate wells, averaged from two independent experiments for each cell line. Statistically significant differences between untreated control and inhibitor treatments are presented as  $**p < 0.01$ ,  $***p < 0.001$ ,  $****p < 0.0001$ .
